# Supplementary material
Source: PubMed Central journal article supplement (PMC3554107)
Supplement: MCB.00976-12_zmb999109807so1.pdf [file MCB.00976-12_zmb999109807so1.pdf]

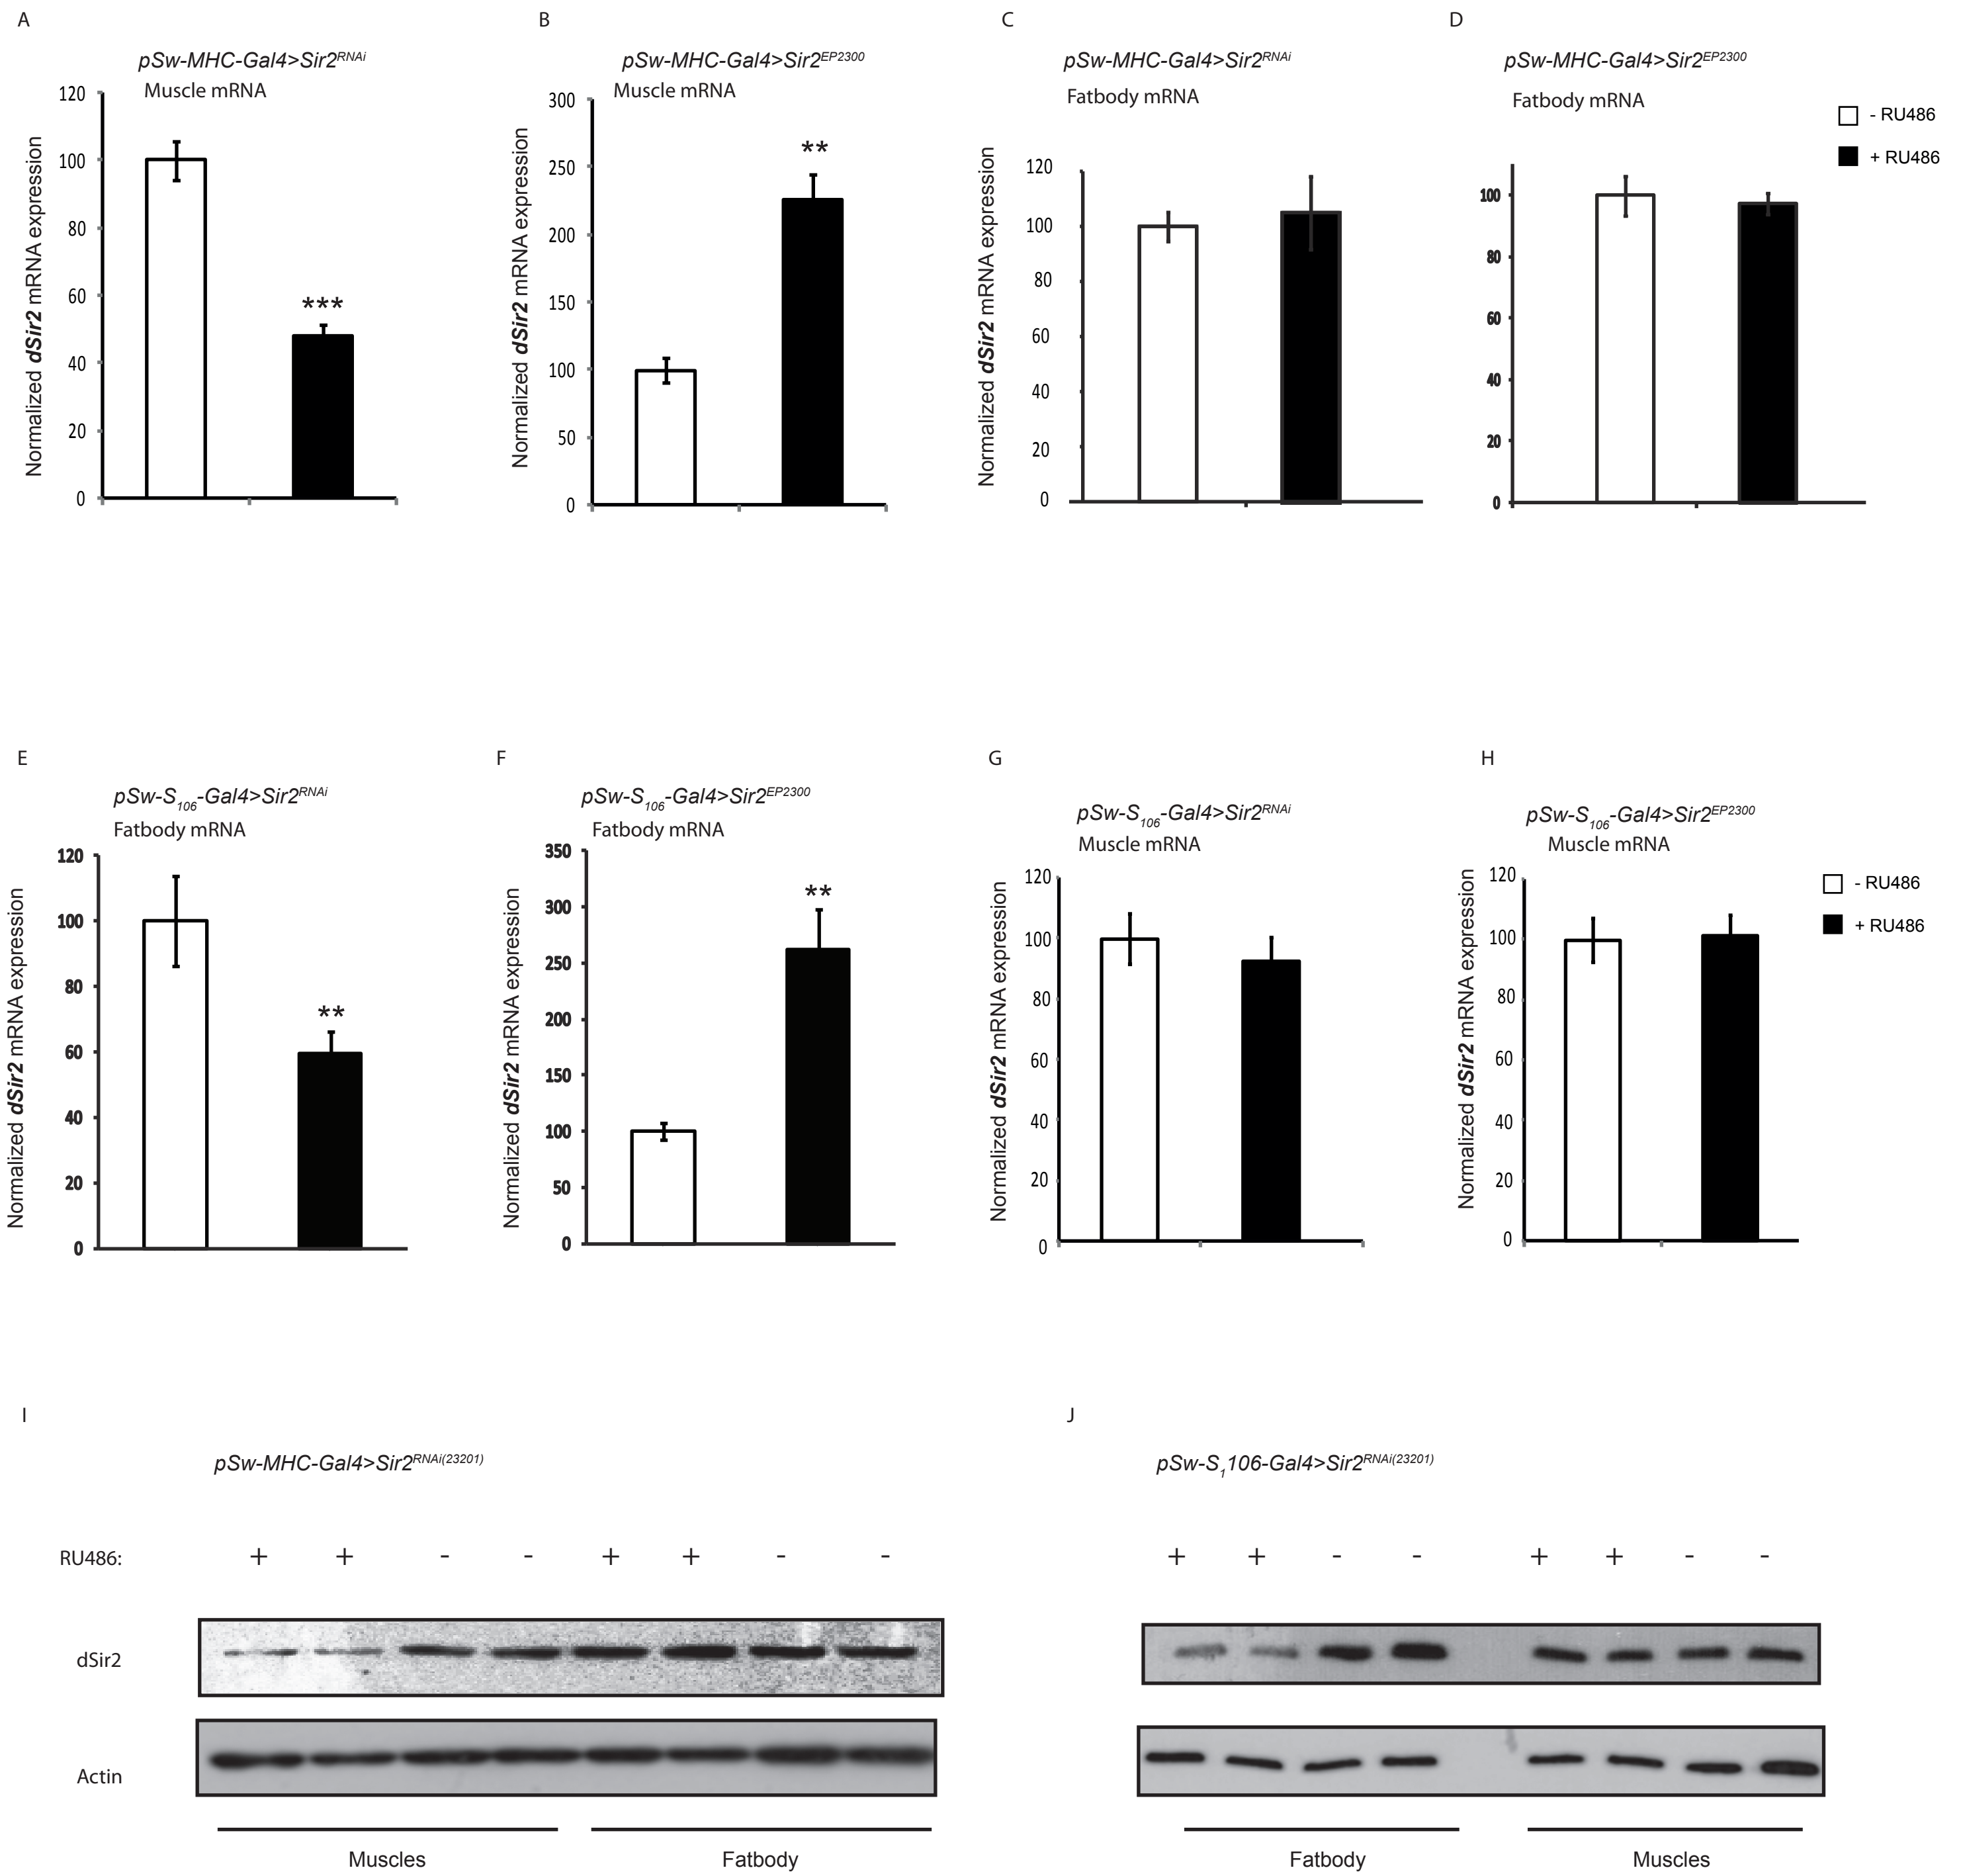

SUPPLEMENTARY FIGURE 1

□ - RU486  
 ■ + RU486

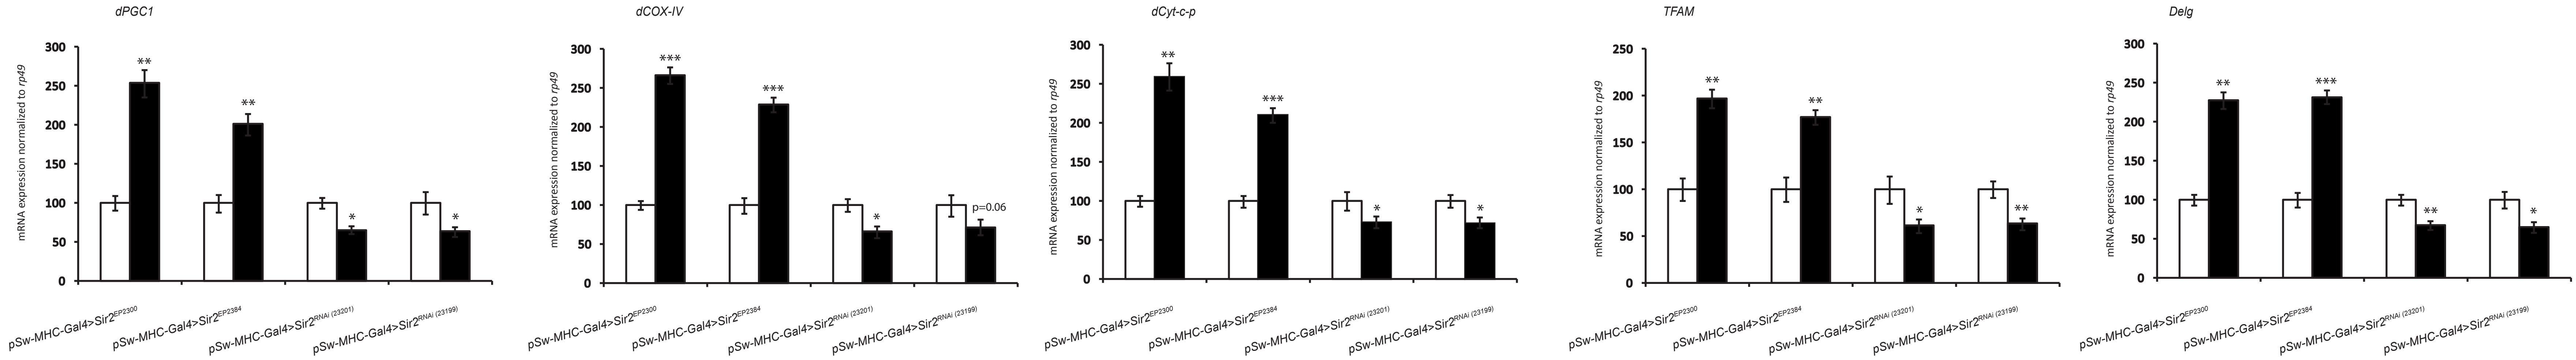

SUPPLEMENTARY FIGURE 2

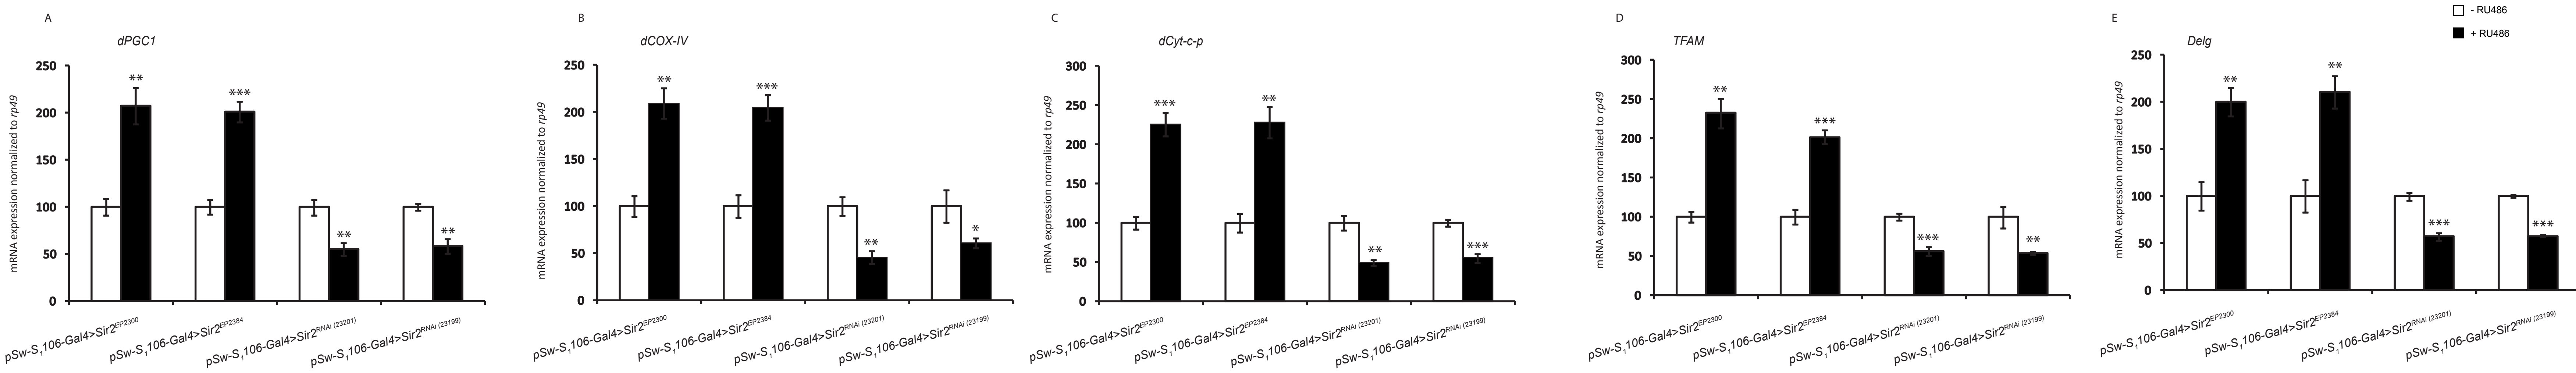

SUPPLEMENTARY FIGURE 3

A

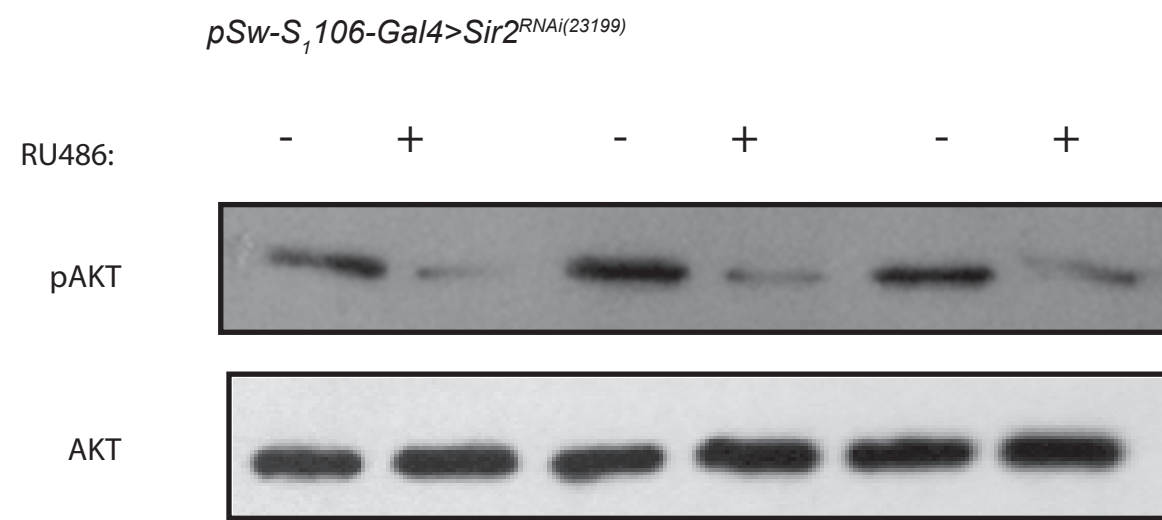

B

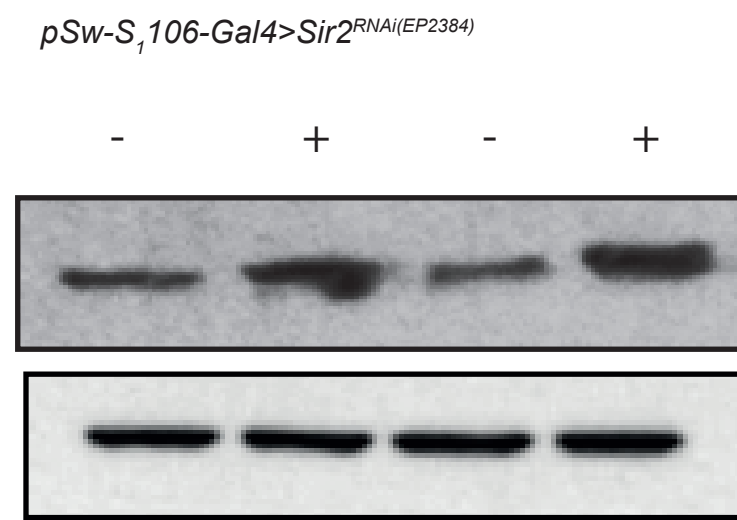

C

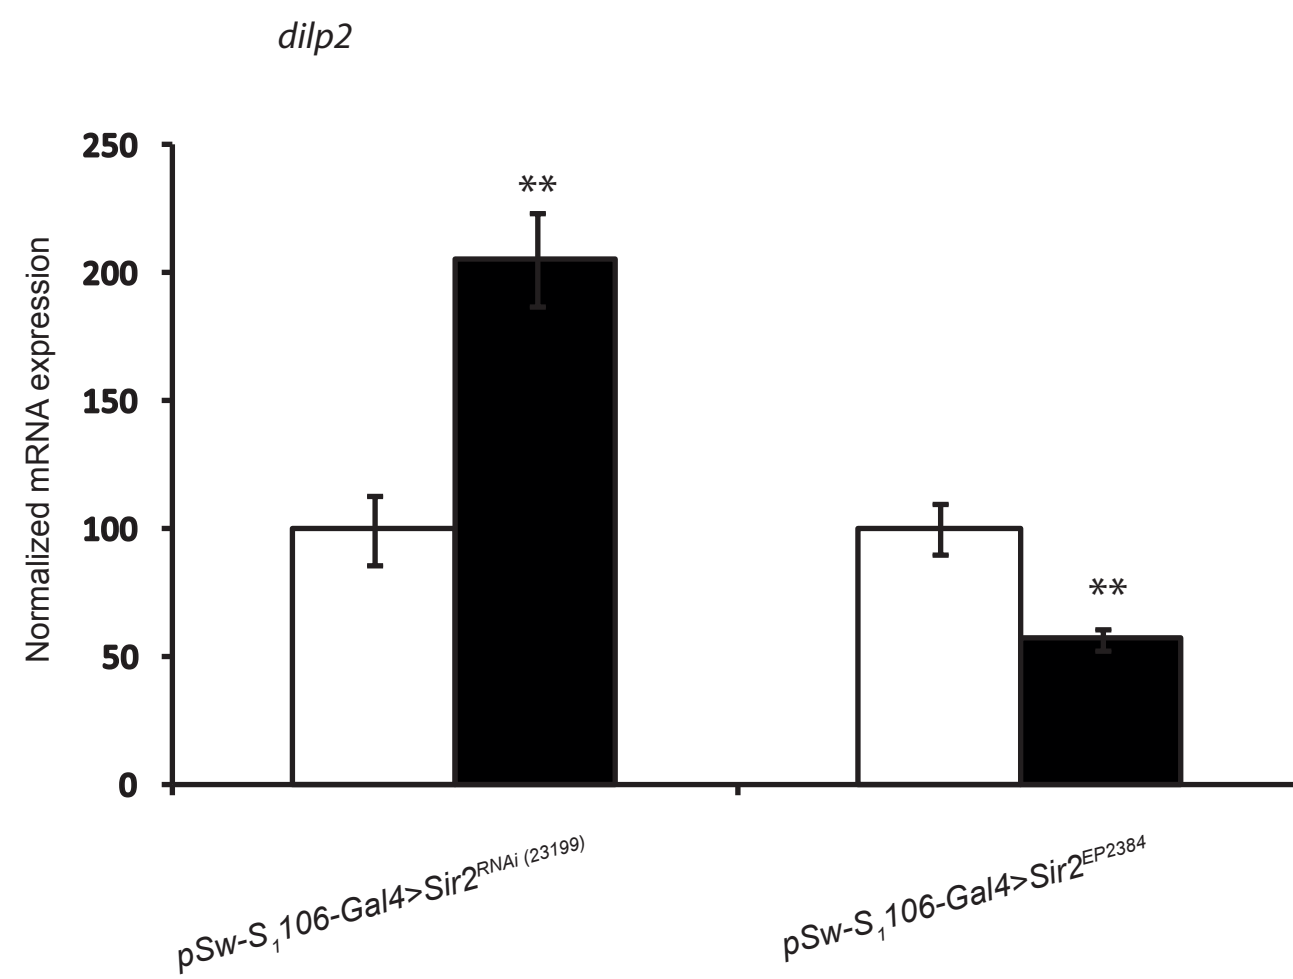

D

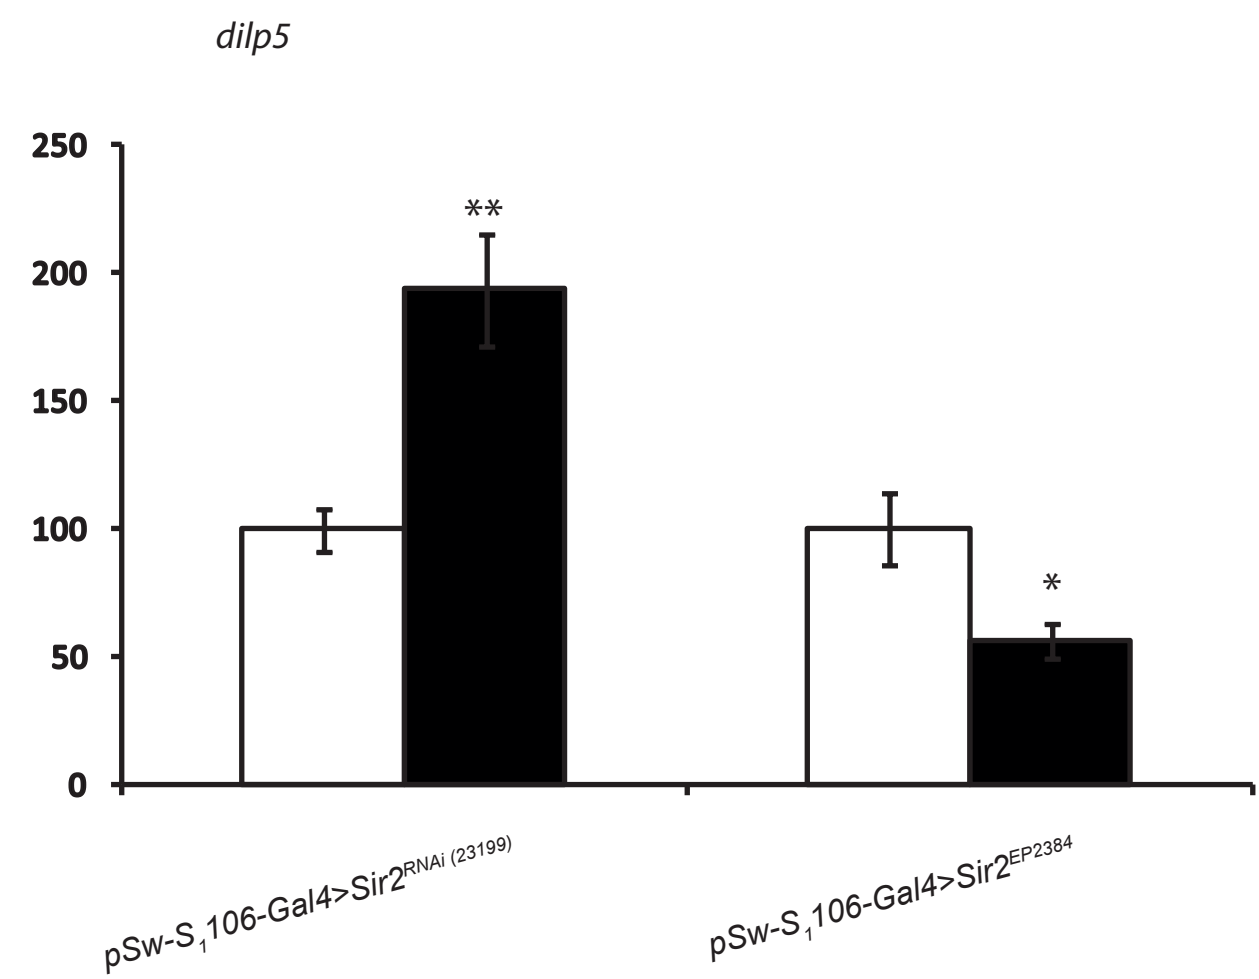

E

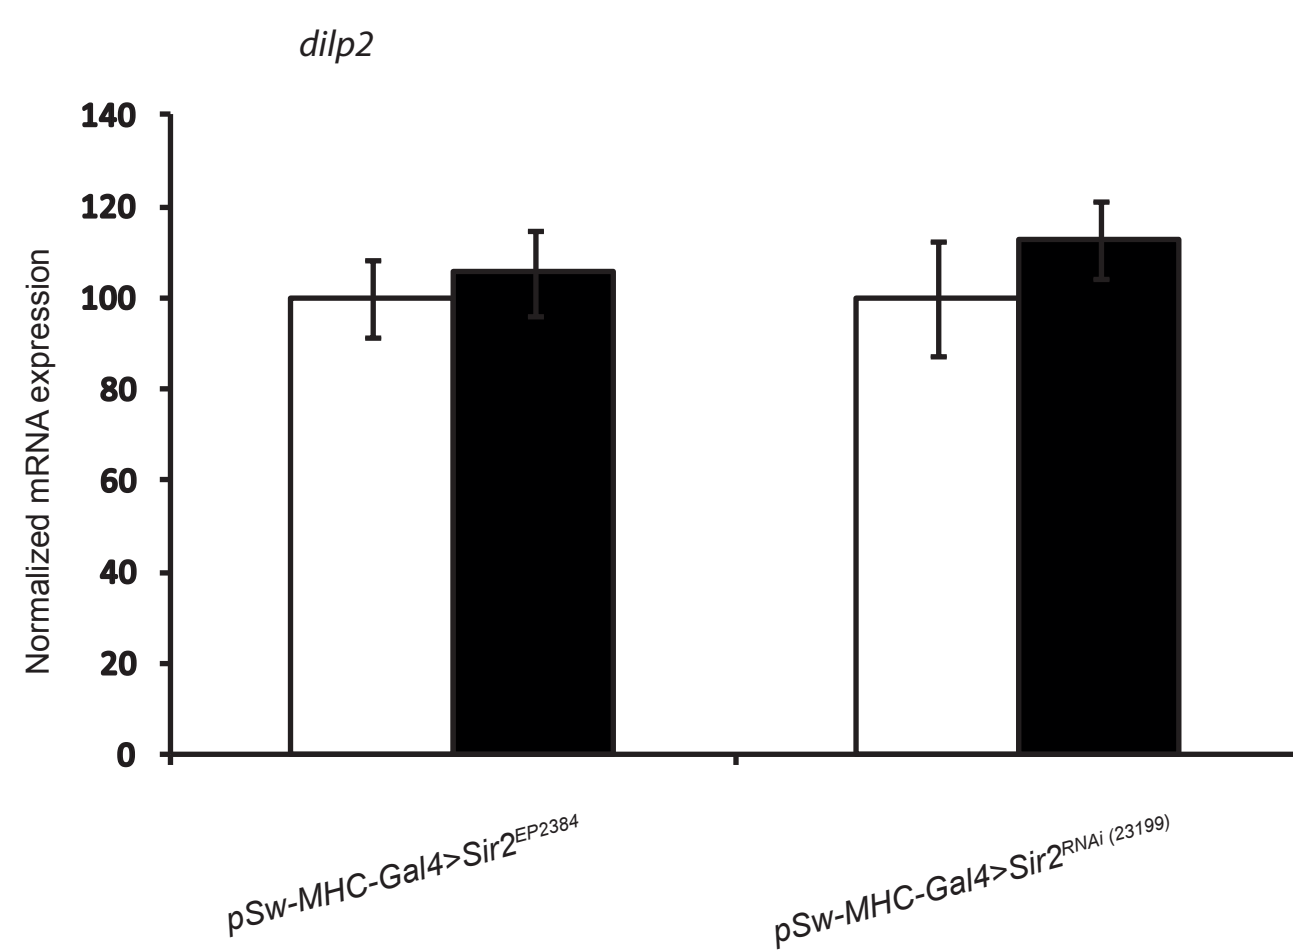

F

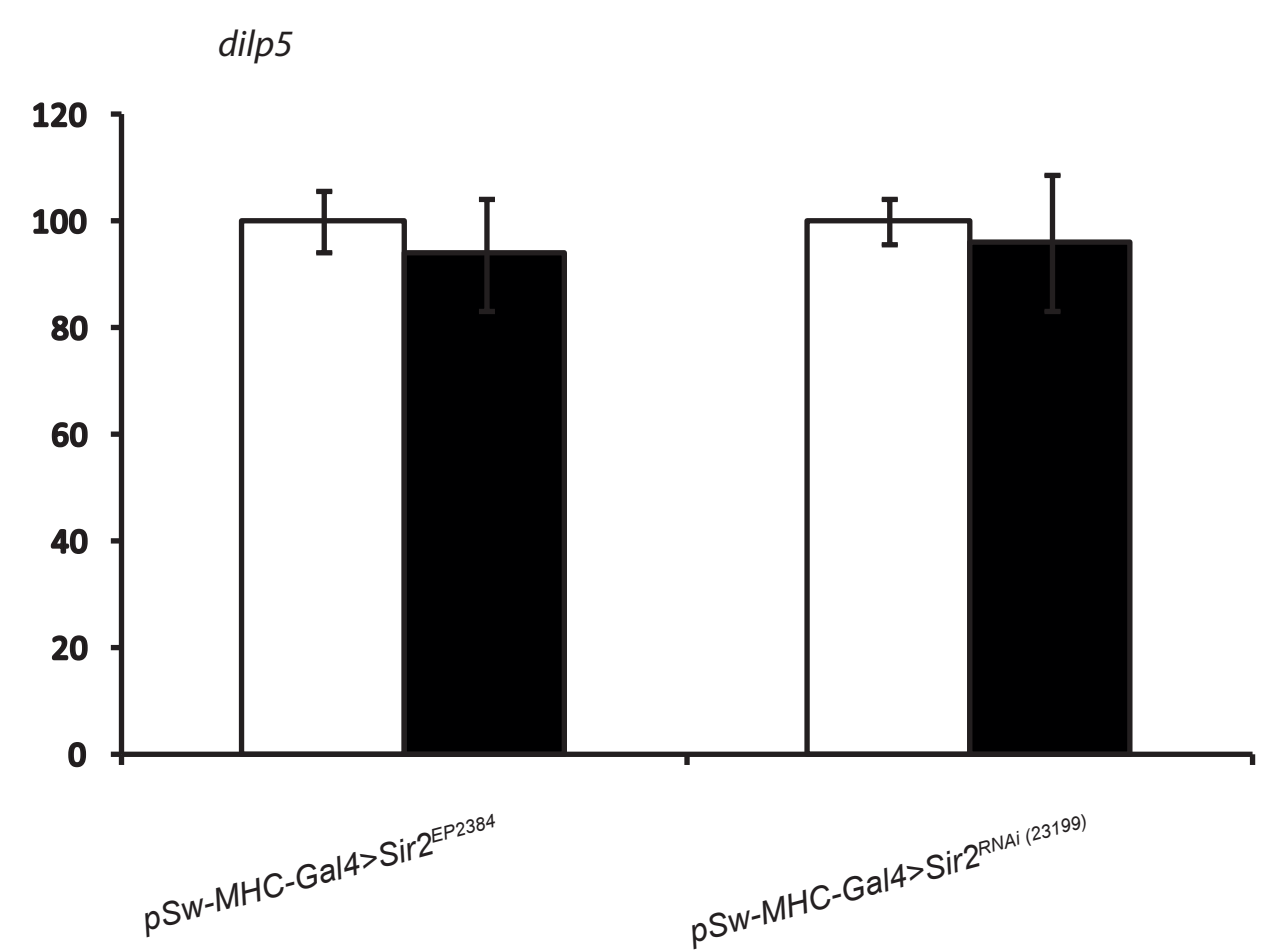

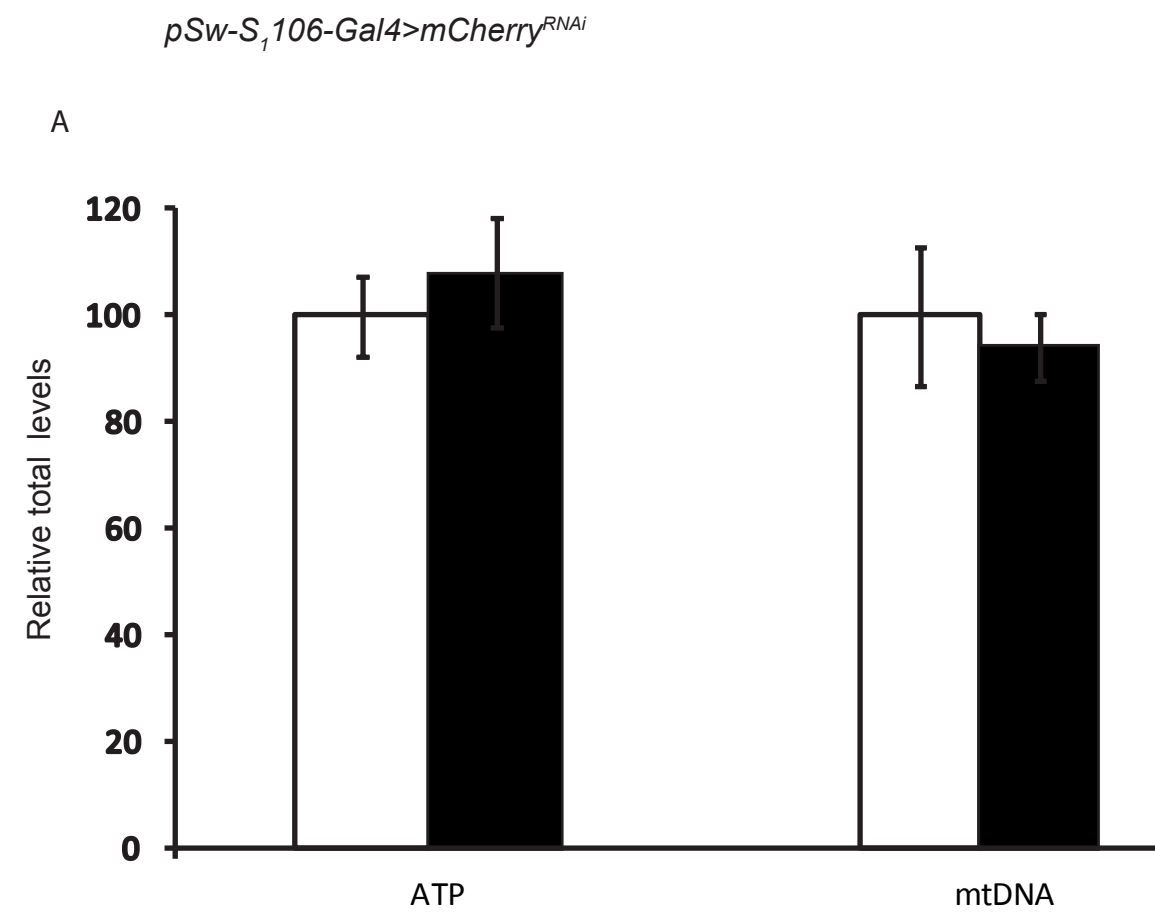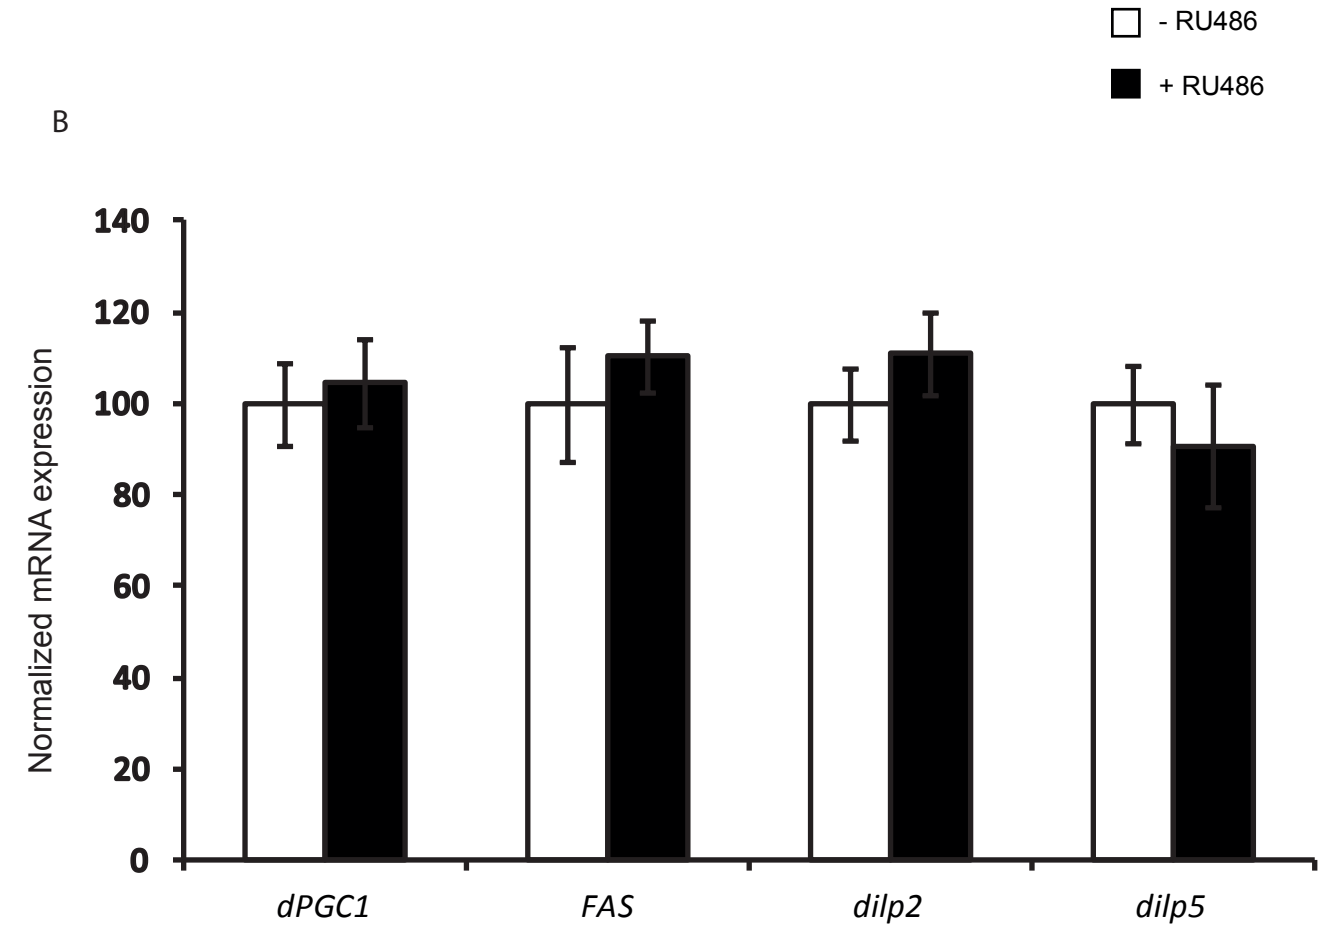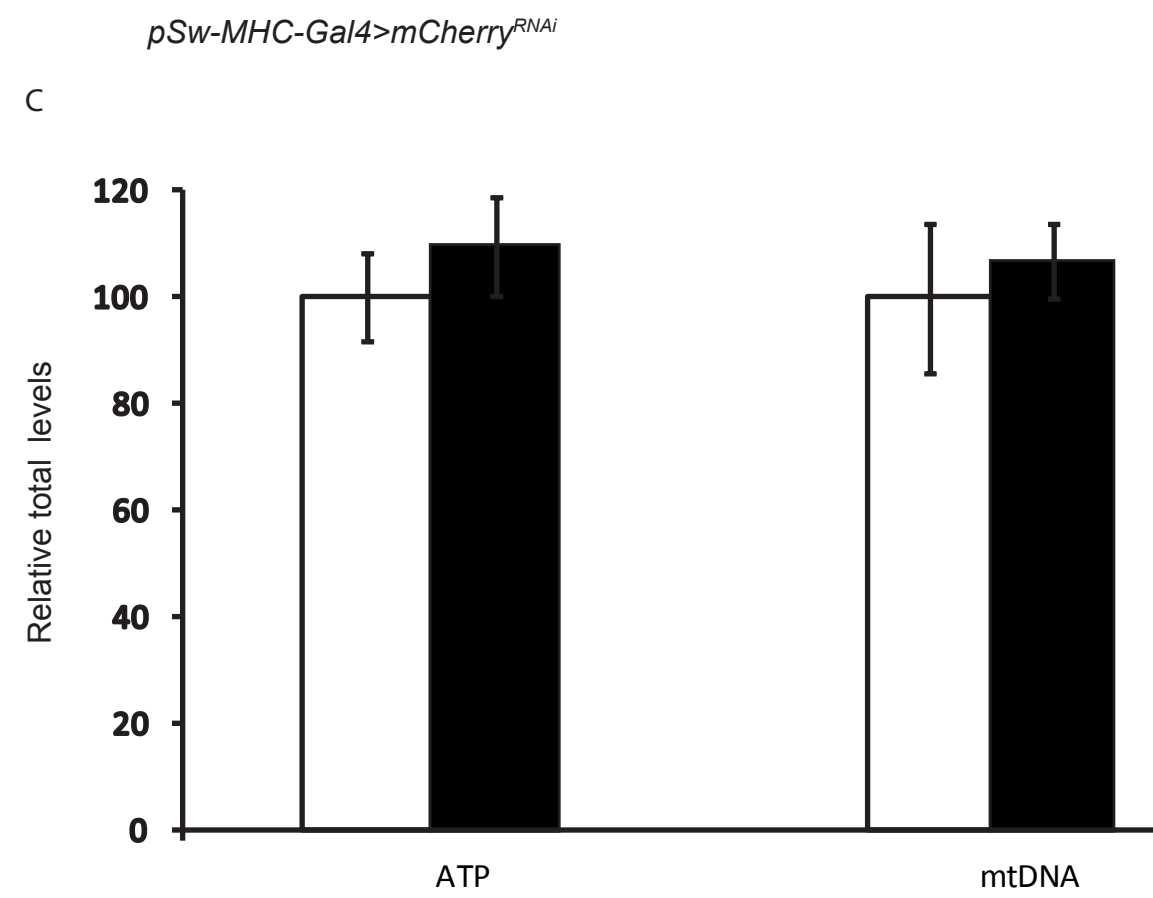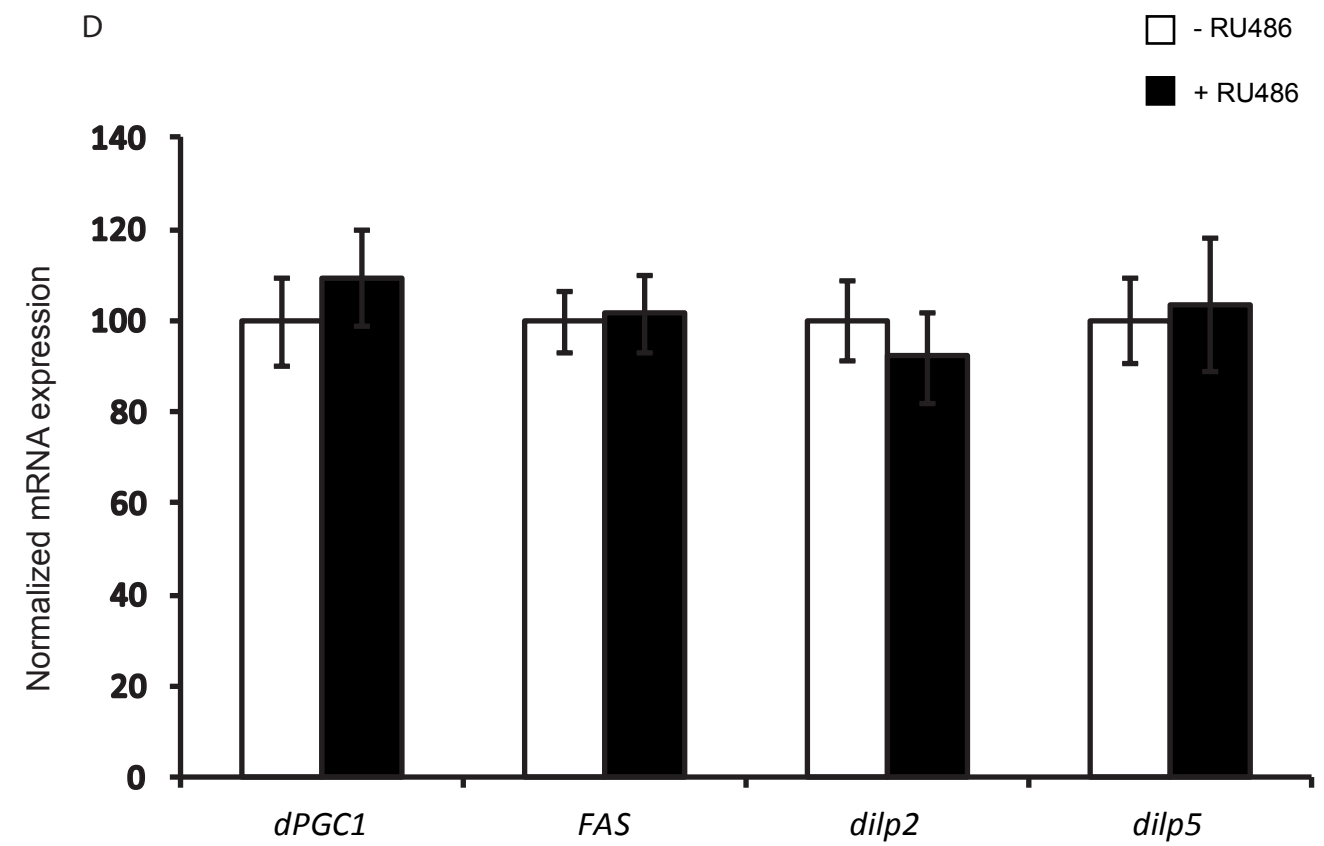

*pSw-S<sub>1</sub>106-Gal4>Sir2<sup>RNAi(23201)</sup>*

□ - RU486  
■ + RU486

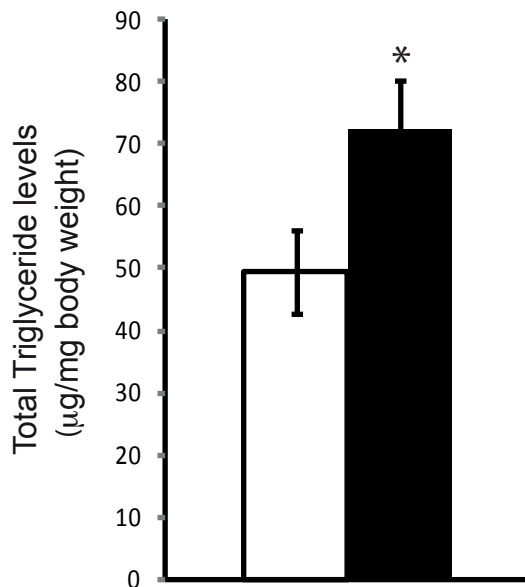

SUPPLEMENTARY FIGURE 6

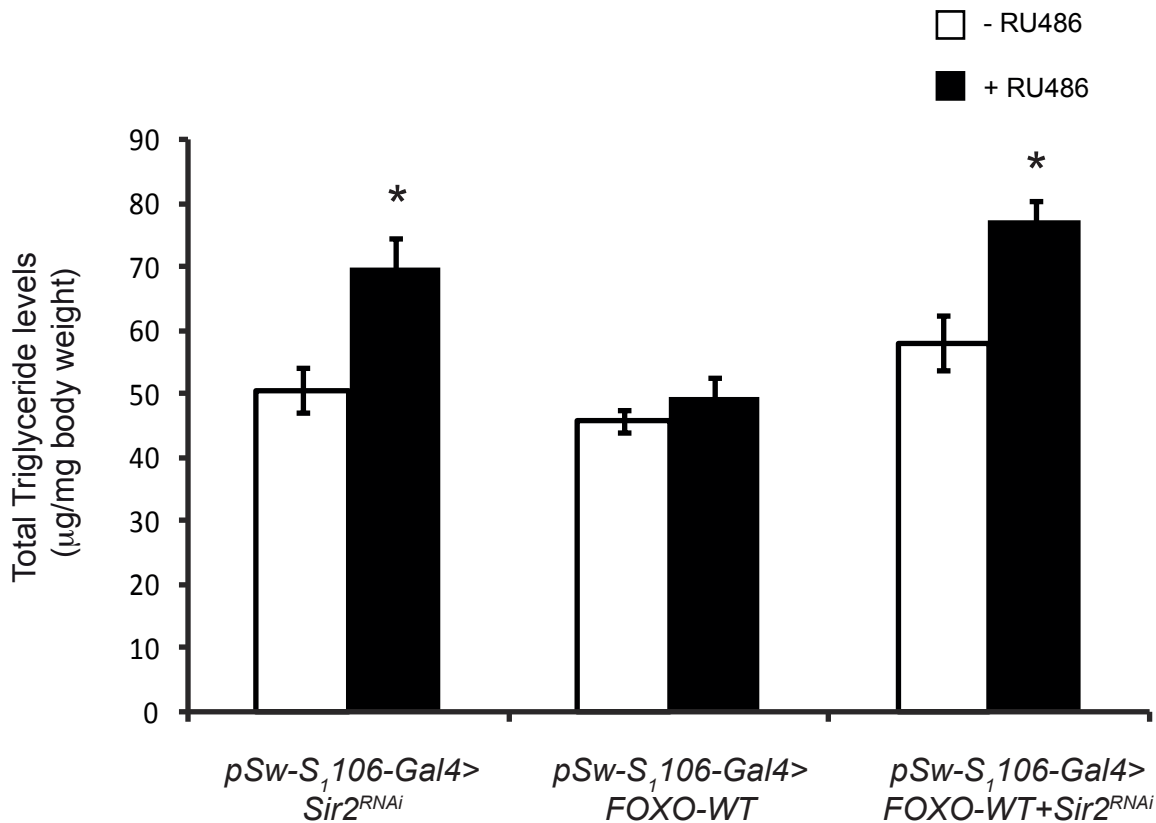

SUPPLEMENTARY FIGURE 7

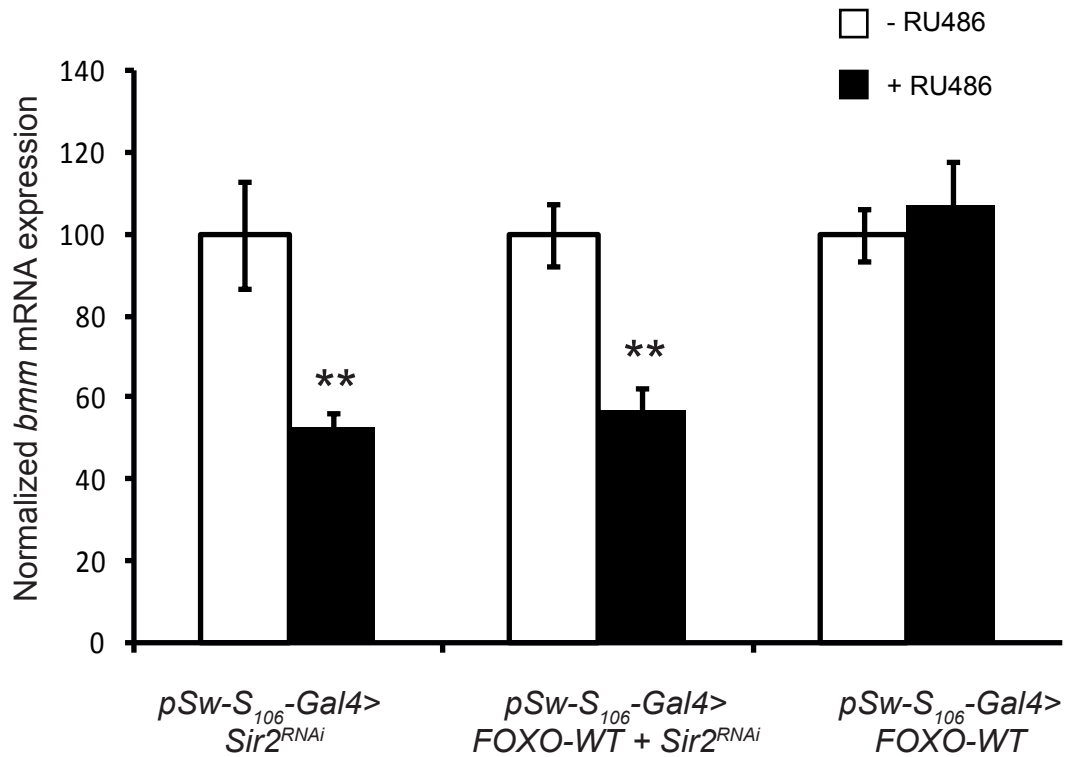

SUPPLEMENTARY FIGURE 8



*pSw-S<sub>1</sub>106-Gal4>Sir2<sup>RNAi</sup>*  
(Fatbody)

□ - RU486  
■ + RU486

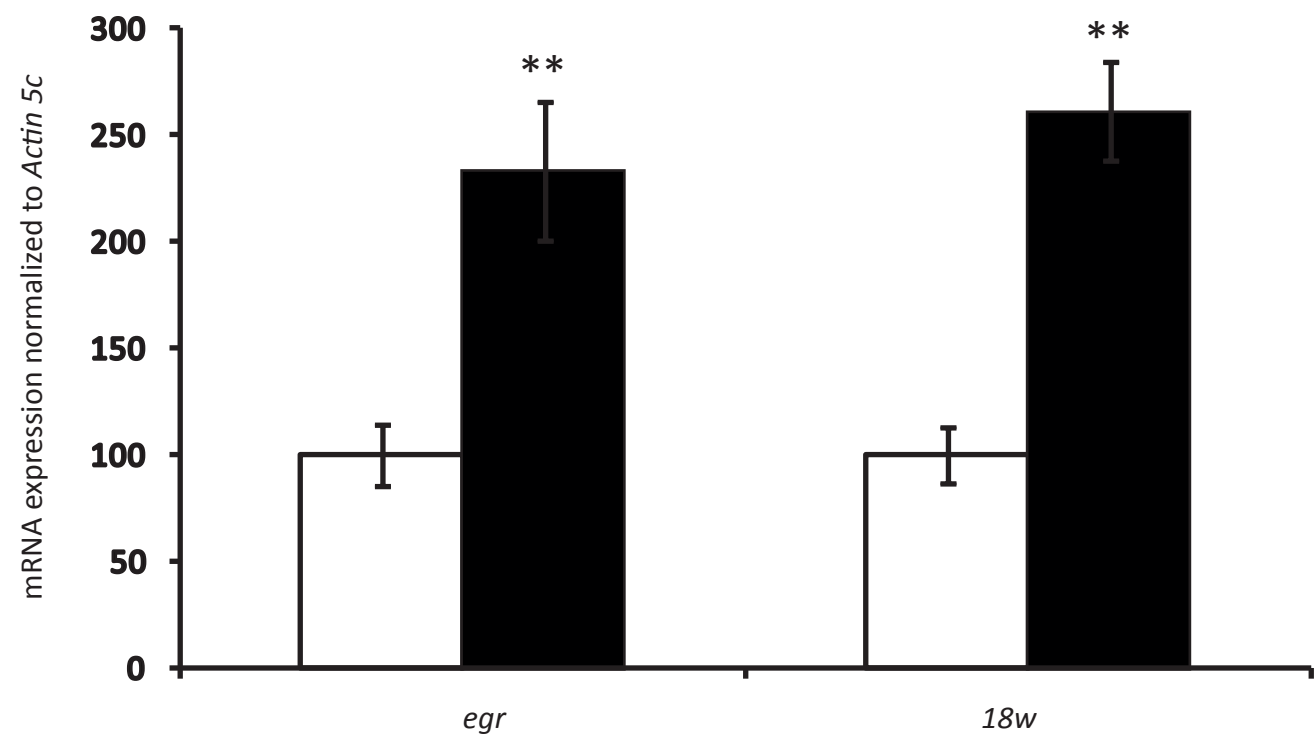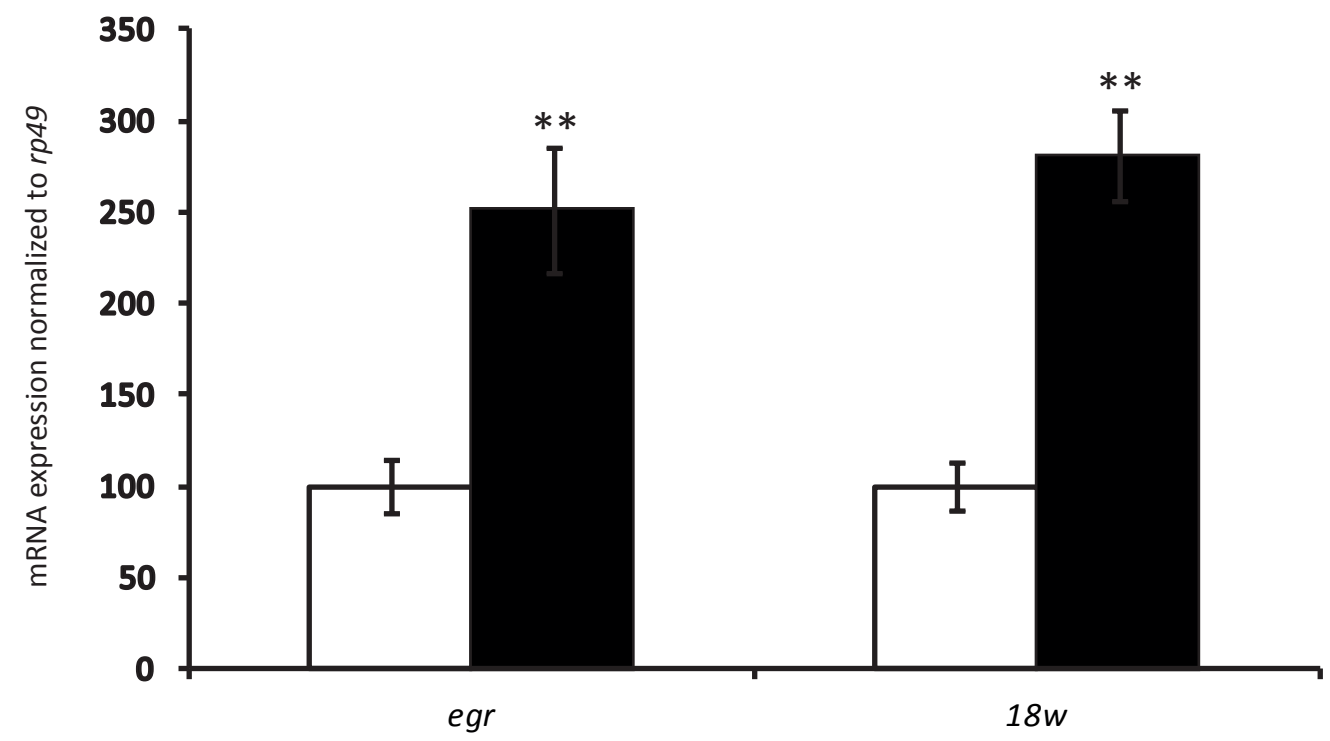

SUPPLEMENTARY FIGURE 9

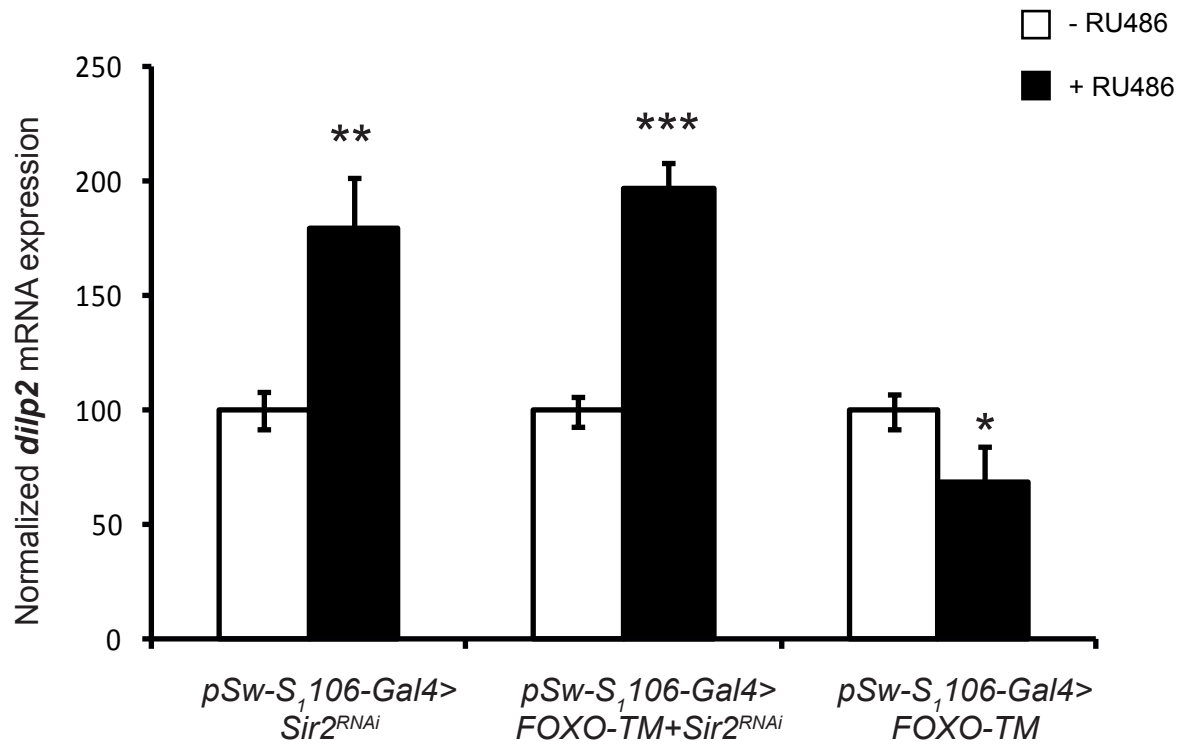

SUPPLEMENTARY FIGURE 10

*pSw-S<sub>1</sub>106-Gal4>Sir2<sup>EP2300</sup>*  
(Fatbody)

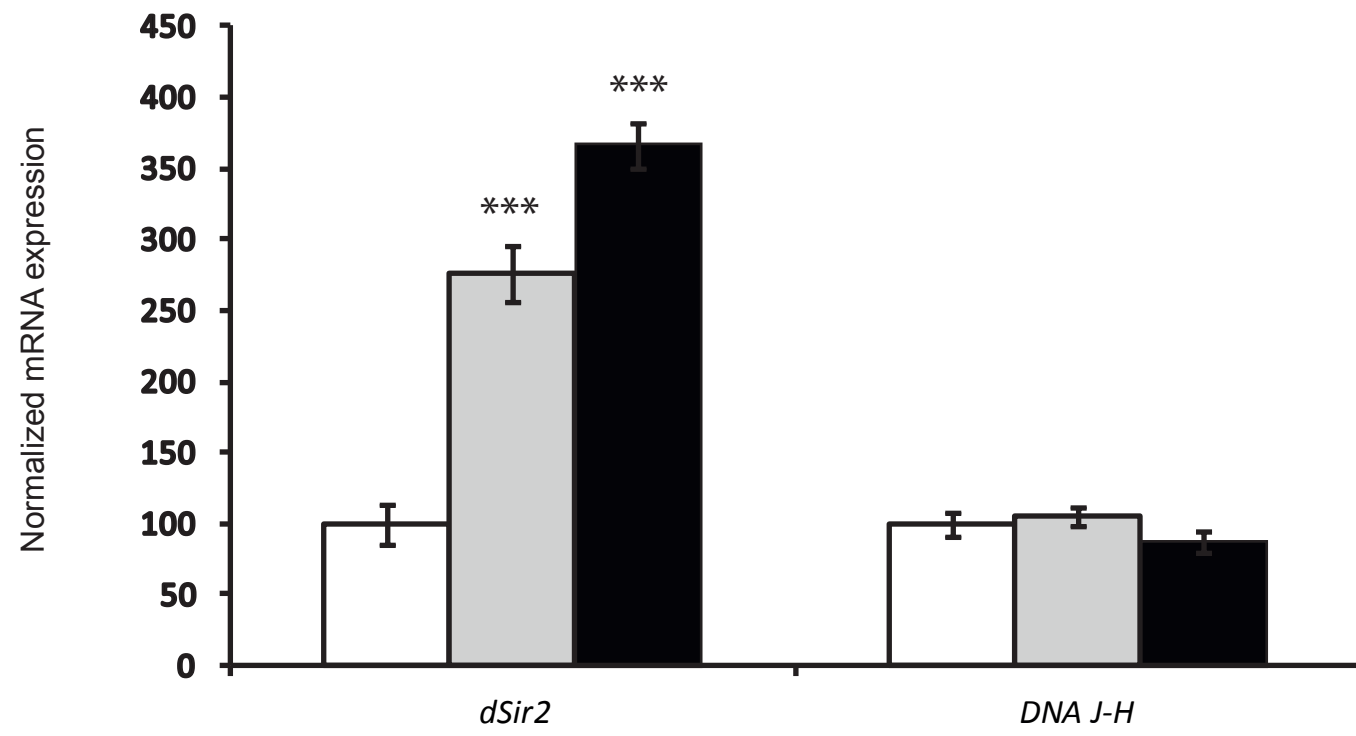

*pSw-MHC-Gal4>Sir2<sup>EP2300</sup>*  
(MuscleS)

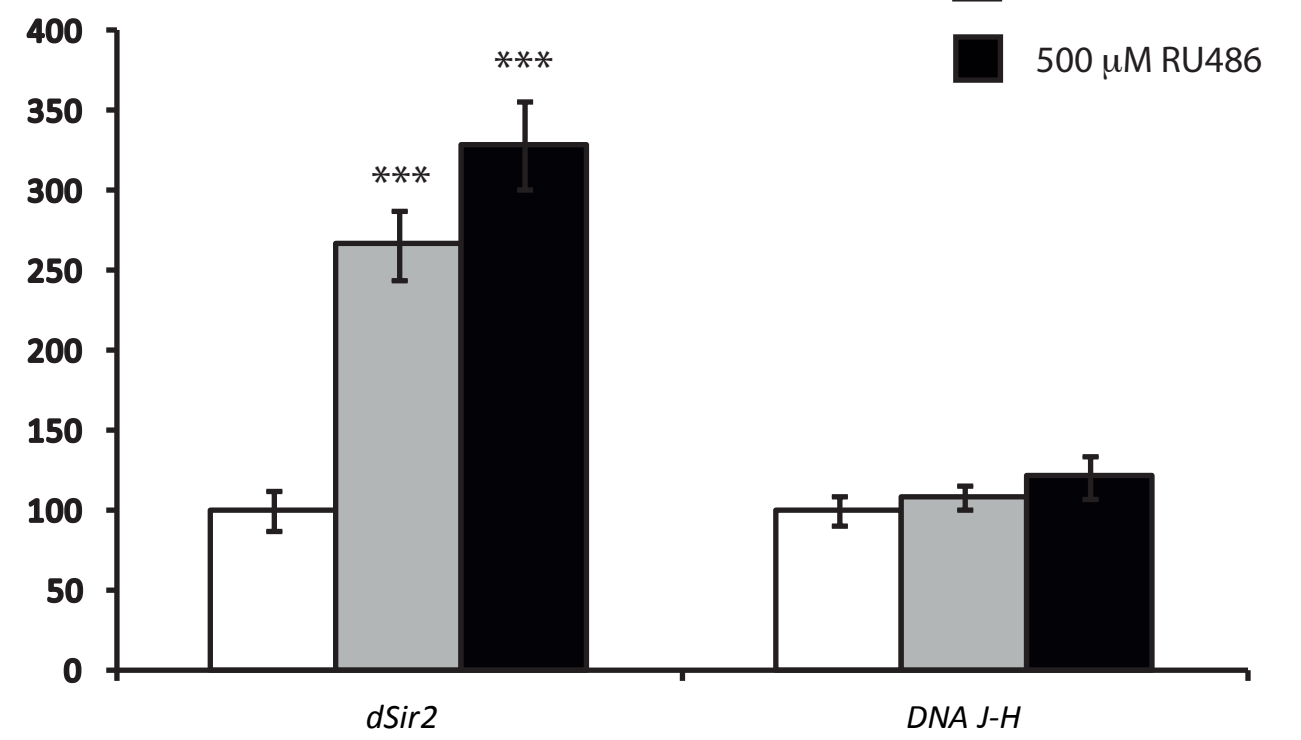

*pSw-S<sub>1</sub>106-Gal4>Sir2<sup>EP2384</sup>*  
(Fatbody)

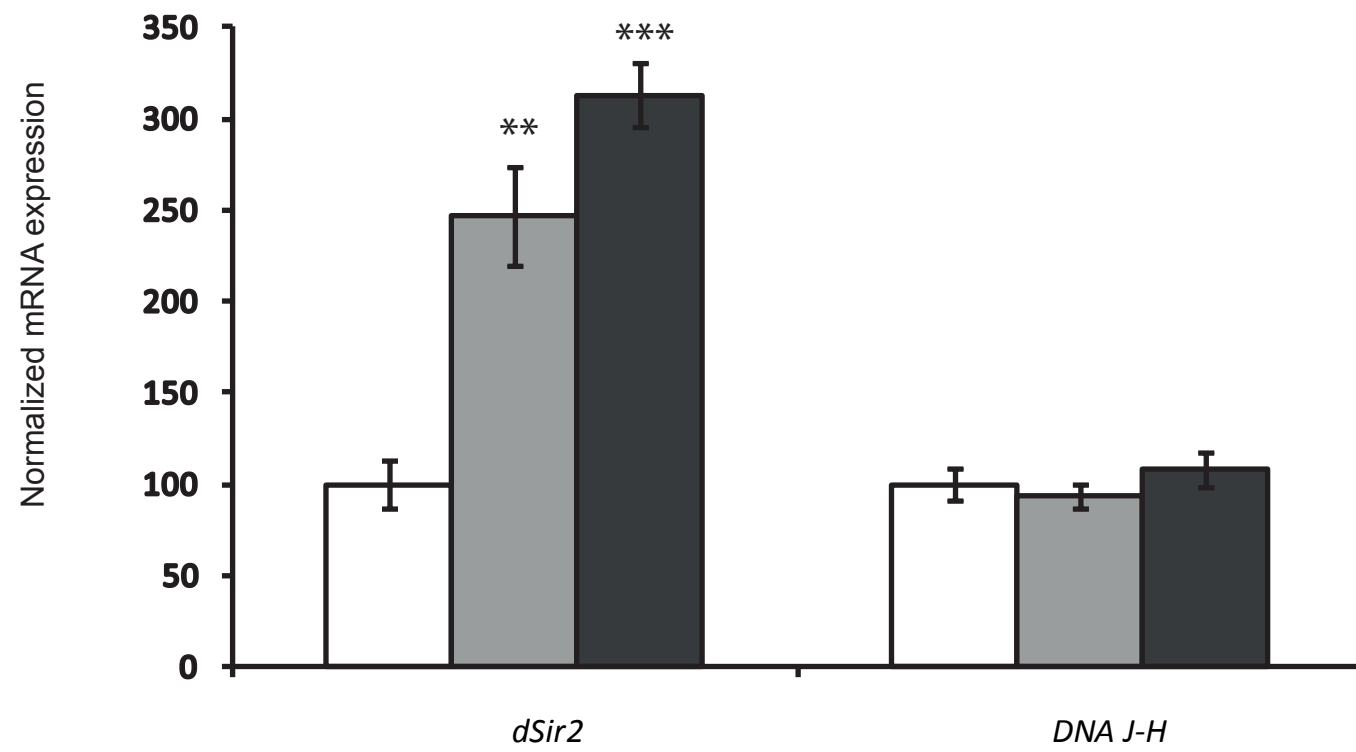

*pSw-MHC-Gal4>Sir2<sup>EP2384</sup>*  
(MuscleS)

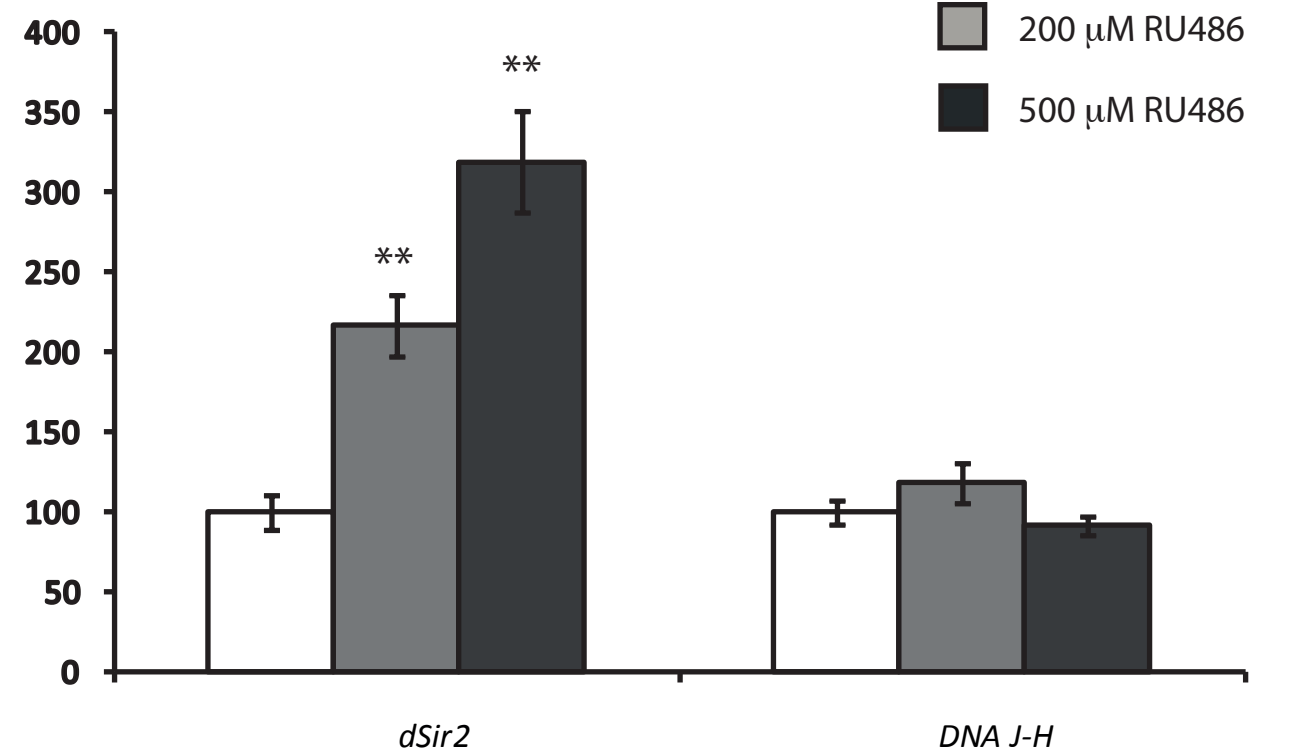

*pSw-MHC-Gal4>Sir2<sup>RNAi(23201)</sup>*  
(Muscles)

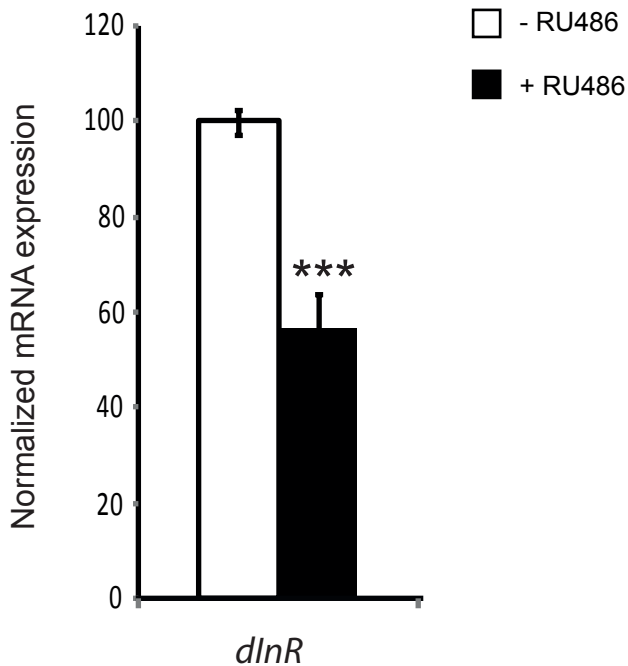

SUPPLEMENTARY FIGURE 12
