# Supplementary material
Source: PubMed Central journal article supplement (PMC3554107)
Supplement: MCB.00976-12_zmb999109807so2.pdf [file MCB.00976-12_zmb999109807so2.pdf]

## Supplementary Figure Legends

### SUPPLEMENTARY FIGURE 1:

Relative expression of *dSir2* to show knockdown and overexpression in muscles (A-B) and fatbody (E-F). Relative expression of *dSir2* in the muscles of *pSw-S<sub>1</sub>106-Gal4>Sir2<sup>RNAi</sup>(23201)* (C-D) and *pSw-S<sub>1</sub>106-Gal4>Sir2<sup>EP2300</sup>* (G-H) flies. n= 60. Western blots to showing tissue specific knockdown of *dSir2* in the muscles of *pSw-MHC-Gal4>Sir2<sup>RNAi</sup>(23201)* (I) and fatbody of *pSw-S<sub>1</sub>106-Gal4>Sir2<sup>RNAi</sup>(23201)* (J). n= 15X3 flies.

### SUPPLEMENTARY FIGURE 2:

Relative expression of *dPGC1*, *dCyt.C-p*, *dCOX-IV*, *TFAM* and *Delg* in the muscles of *pSw-MHC-Gal4>Sir2<sup>RNAi</sup>(23199)*, *pSw-MHC-Gal4>Sir2<sup>RNAi</sup>(23201)*, *pSw-MHC-Gal4>Sir2<sup>EP2384</sup>*, *pSw-MHC-Gal4>Sir2<sup>EP2300</sup>*, normalized to *rp49* (A-E). n=36 flies.

### SUPPLEMENTARY FIGURE 3:

Relative expression of *dPGC1*, *dCyt.C-p*, *dCOX-IV*, *TFAM* and *Delg* in the muscles of *pSw-S<sub>1</sub>106-Gal4>Sir2<sup>RNAi</sup>(23199)*, *pSw-S<sub>1</sub>106-Gal4>Sir2<sup>RNAi</sup>(23201)*, *pSw-S<sub>1</sub>106-Gal4>Sir2<sup>EP2384</sup>*, *pSw-S<sub>1</sub>106-Gal4>Sir2<sup>EP2300</sup>*, normalized to *rp49* (A-E). n=36 flies.

### SUPPLEMENTARY FIGURE 4:

p-AKT and AKT levels in the muscles of *S<sub>1</sub>106-Gal4>Sir2<sup>RNAi</sup>(23199)* and *pSw-S<sub>1</sub>106-Gal4>Sir2<sup>EP2384</sup>* (A and B) n= 15X3 flies. Relative expression of *dilps -2* and *-5* in head samples of *S<sub>1</sub>106-Gal4>Sir2<sup>RNAi</sup>(23199)* and *pSw-S<sub>1</sub>106-Gal4>Sir2<sup>EP2384</sup>* (B-C) and *pSw-MHC-Gal4>Sir2<sup>RNAi</sup>(23199)* and *pSw-MHC-Gal4>Sir2<sup>EP2384</sup>* (D-E). n= 24 flies.

### SUPPLEMENTARY FIGURE 5:

Relative levels of ATP and mtDNA (A) and relative expression of *dPGC1*, *FAS*, *dilp2* and *dilp5* (B) in *pSw-S<sub>1</sub>106-Gal4>mCherry<sup>RNAi</sup>*. n= 24 flies. Relative levels of ATP and mtDNA (A) and relative expression of *dPGC1*, *FAS*, *dilp2* and *dilp5* (B) in *pSw-MHC-Gal4>mCherry<sup>RNAi</sup>*. n= 24 flies.

### SUPPLEMENTARY FIGURE 6:

Total triglyceride levels in the fatbody of *pSw-S<sub>1</sub>106-Gal4> Sir2<sup>RNAi</sup>(23201)*. n=36 flies

### SUPPLEMENTARY FIGURE 7:

Total triglyceride levels in *pSw-S<sub>1</sub>106-Gal4>Sir2<sup>RNAi</sup>(23201)*, *pSw-S<sub>1</sub>106-Gal4>FOXO-WT+Sir2<sup>RNAi</sup>(23201)*, *pSw-S<sub>1</sub>106-Gal4>FOXO-WT*

### SUPPLEMENTARY FIGURE 8:

Relative expression of *brummer* in *pSw-S<sub>1</sub>106-Gal4>Sir2<sup>RNAi</sup>(23201)*, *pSw-S<sub>1</sub>106-Gal4>FOXO-WT+Sir2<sup>RNAi</sup>(23201)*, *pSw-S<sub>1</sub>106-Gal4>FOXO-WT*.

SUPPLEMENTARY FIGURE 9:

Relative expression of inflammatory genes *egr* (*TNF- $\alpha$* ) and *18w* (*IL-2*) in the fatbody of *pSw-S<sub>1</sub>106-Gal4 > Sir2<sup>RNAi(23201)</sup>* normalized to *Actin5c* (A) and *rp49* (B). n= 15X3 flies.

SUPPLEMENTARY FIGURE 10:

Normalized expression of *dilp2* in head samples of *pSw-S<sub>1</sub>106-Gal4 > Sir2<sup>RNAi(23201)</sup>*, *pSw-S<sub>1</sub>106-Gal4 > FOXO-TM + Sir2<sup>RNAi(23201)</sup>* and *pSw-S<sub>1</sub>106-Gal4 > FOXO-TM* flies. n=24

SUPPLEMENTARY FIGURE 11:

Relative expression of *dSir2* and *DNA J-H* in the fatbody of *pSw-S<sub>1</sub>106-Gal4 > Sir2<sup>EP2300</sup>* and *pSw-S<sub>1</sub>106-Gal4 > Sir2<sup>EP2384</sup>* (A and B) and muscles of *pSw-MHC-Gal4 > Sir2<sup>EP2300</sup>*, *pSw-MHC-Gal4 > Sir2<sup>EP2384</sup>* (C and D) at varying concentrations of RU486. n= 24 flies.

SUPPLEMENTARY FIGURE 12:

Relative expression of *dInR* in the muscles of *pSw-MHC-Gal4 > Sir2<sup>RNAi(23201)</sup>*. n= 24 flies

SUPPLEMENTARY TABLE 1:

List of primers used for qRT-PCR.

| GENE            | PRIMER SEQUENCES                                           |
|-----------------|------------------------------------------------------------|
| <i>Actin5C</i>  | F: GAGGCTTGCGGCATCCACGAGACCAC<br>R: GACAGAGTACTTGCCTCTGGCG |
| <i>Brummer</i>  | F: TCCCGAGTTTCTGTCCAAGT<br>R: GCGTCCTTTCTGTGCTTCTT         |
| <i>dCOXIV</i>   | F: ACCAACGAGATCAACGCTCT<br>R: GCGCAGAAGAGGAGTGAAAC         |
| <i>dCyt-C-p</i> | F: TTCCTGCTGGTGATGTTGAG<br>R: GTGTCCTCGTCCAGGTGAT          |
| <i>dilp2</i>    | F: AGCAAGCCTTTGTCCTTCATCTC<br>R: ACACCATACTCAGCACCTCGTTG   |
| <i>dilp5</i>    | F: GAGGCACCTTGGGCCTATTC<br>R: CATGTGGTGAGATTCGGAGCTA       |
| <i>DNA J-H</i>  | F: ATACGACCTGTCCGACTTGCATG<br>R: TTCTGCTCTACGAAACCACTGCCC  |
| <i>d4eBP</i>    | F: AACCTCTACTCCACCACTC<br>R: CAATCTTCAGCGACTTGG            |
| <i>Delg</i>     | F: ACTACGTCATCCATGAATCC<br>R: TCGTAATAGTAGCGGAGAGC         |
| <i>dFOXO</i>    | F: GAACCAGTCGGAATGCAAGT<br>R: ACCCTCATAAAGCGGTTGTG         |
| <i>dInR</i>     | F: ACGATGTAGAGGGCAGTGTA<br>R: TACCACGAAGATAGCGTAGC         |
| <i>dPGC1</i>    | F: CCAAGCAGGCGAAAATAGAG<br>R: TACGCAGCACCTTGTTCTTG         |
| <i>dSir2</i>    | F: GAACGAGCAACGAGGATGAG<br>R: ATAGTCCCACAGCACGGAGT         |
| <i>FAS</i>      | F: CGGAGAAGAGTTACATCCTG<br>R: CAATCACCACCTTTACGC           |
| <i>rp49</i>     | F: TACAGGCCCAAGATCGTGAA<br>R: TCTCCTTGCGCTTCTTGGA          |
